# Supplementary material for: “Reactive” probe for hydrogen sulfite: “turn-on” fluorescent sensing and bioimaging application
Source: Royal Society of Chemistry journal article supplement (doi:10.1039/c3tb20159g), 2013-01-01
Supplement: c3tb20159g.pdf [file c3tb20159g.pdf]

Electronic Supplementary Information (ESI)

# “Reactive” Probe for Hydrogen Sulfite: “Turn-on” Fluorescent Sensing and Bioimaging Application

Xiaohong Cheng,<sup>+</sup> Huizhen Jia,<sup>+</sup> Jun Feng,<sup>\*</sup> Jingui Qin, and Zhen Li<sup>\*</sup>

Department of Chemistry, Hubei Key Lab on Organic and Polymeric Opto-Electronic Materials,

Wuhan University, Wuhan 430072, China

<sup>+</sup>Contribute equally to this manuscript.

<sup>\*</sup>Corresponding author. Phone: 86-27-62254108; Fax: 86-27-68756757; E-mail: [lizhen@whu.edu.cn](mailto:lizhen@whu.edu.cn) or

[lichemlab@163.com](mailto:lichemlab@163.com).

**Scheme S1.** Chemical reaction-based chemosensors developed in our group.

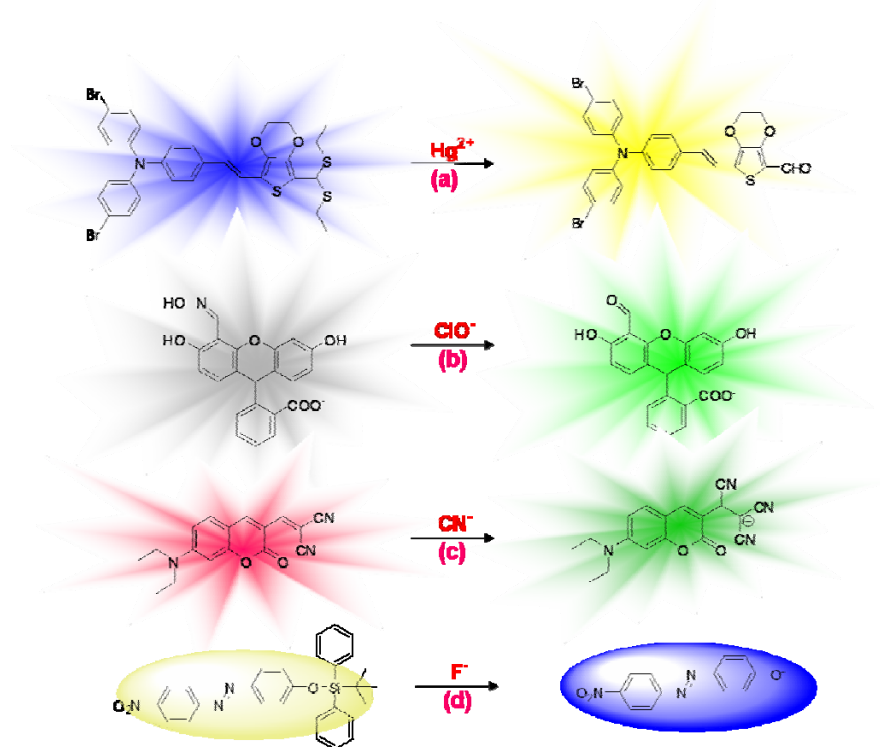

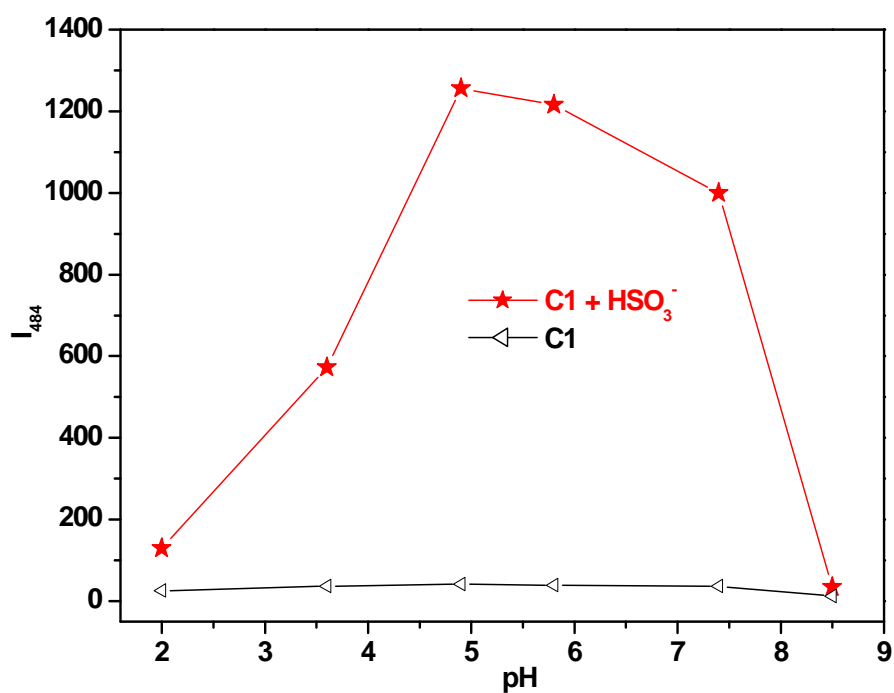

**Figure S1.** Fluorescent emission spectra of **C1** and **C1** +  $HSO_3^-$  at different pH value in THF/ $H_2O$  (1/99, 200 mM  $Na_2HPO_4$ -citric acid buffer), excited at 408 nm.

**Chart S1.** The reaction equilibrium of the sensing system at pH = 7.0.

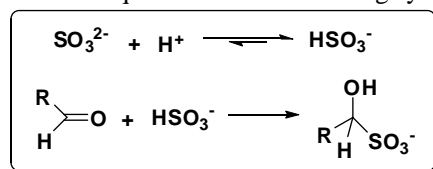

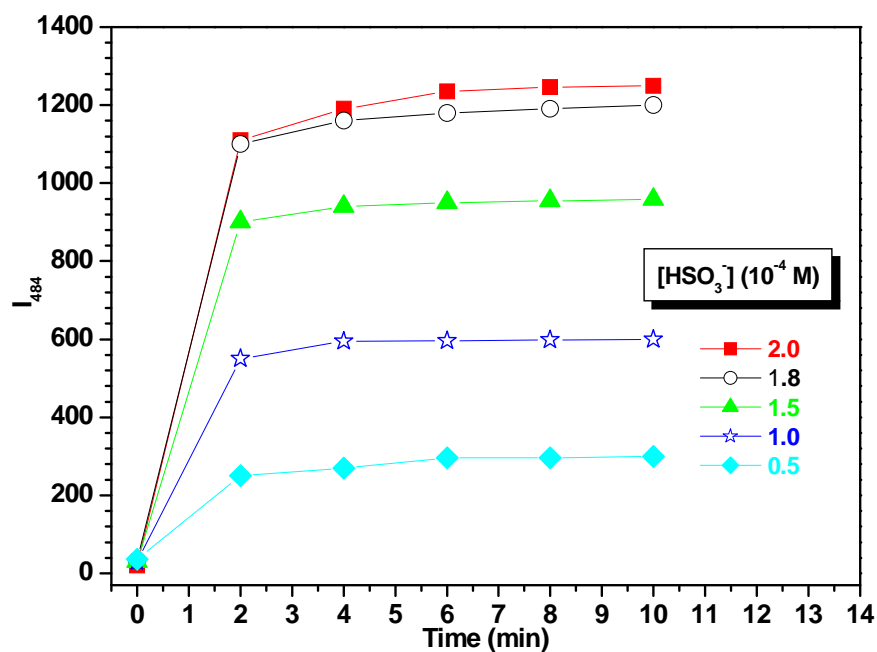

**Figure S2.** Reaction-time profile of C1 (10  $\mu$ M, in THF/H<sub>2</sub>O = 1/99, pH 5.0) in the presence of different concentrations of HSO<sub>3</sub><sup>-</sup> excited at 408 nm.

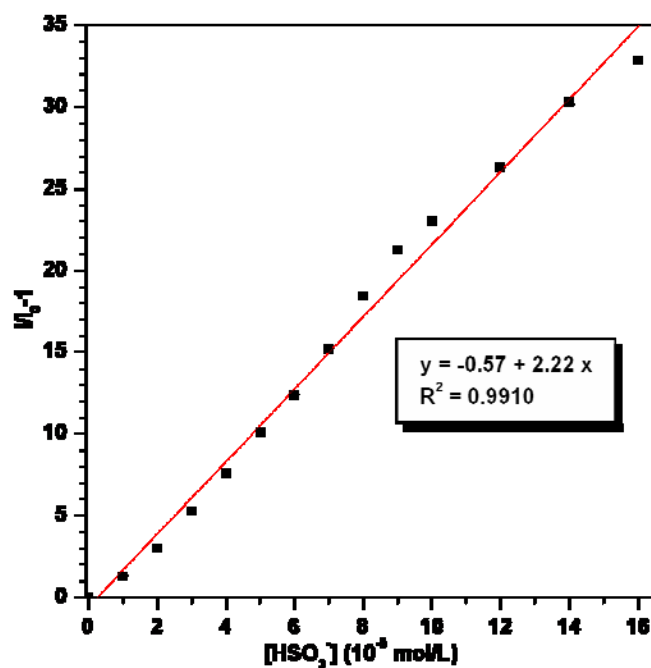

**Figure S3.** Plot of fluorescent intensity of C1 (10  $\mu$ M, in THF/H<sub>2</sub>O = 1/99, pH 5.0) as a function of the concentration of HSO<sub>3</sub><sup>-</sup>.

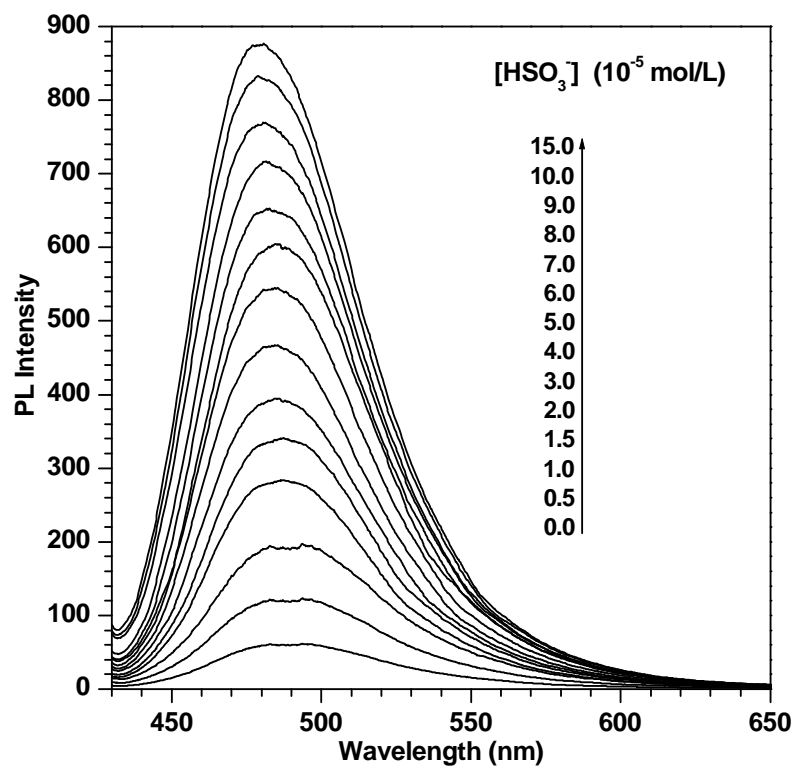

**Figure S4.** Fluorescent emission spectra of **C1** (2  $\mu\text{M}$ , in THF/H<sub>2</sub>O = 1/99, pH 5.0) in the presence of different concentrations of  $\text{HSO}_3^-$  excited at 408 nm.

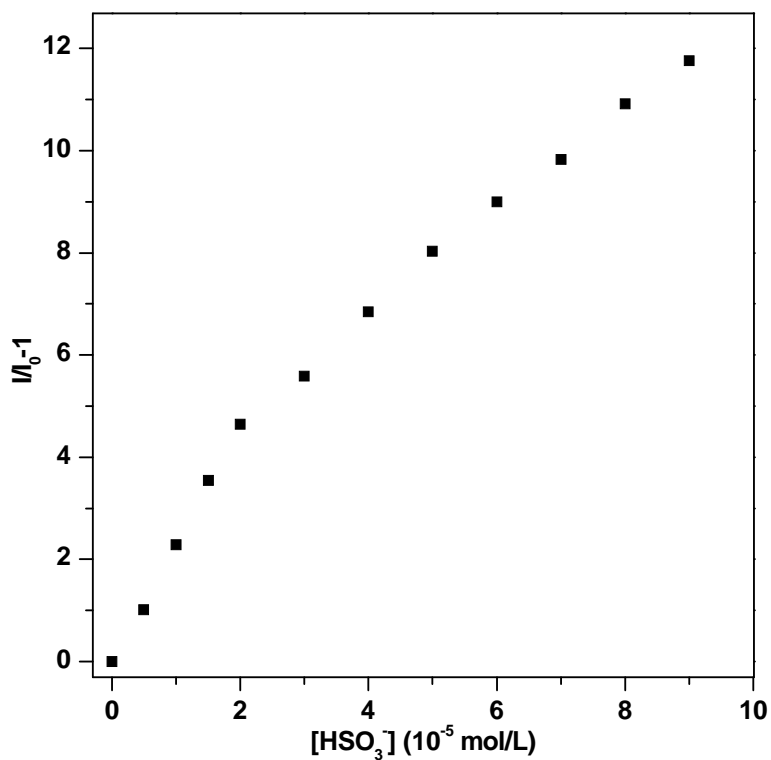

**Figure S5.** Plot of fluorescent intensity of **C1** (2  $\mu\text{M}$ , in THF/H<sub>2</sub>O = 1/99, pH 5.0) as a function of the concentration of  $\text{HSO}_3^-$ .

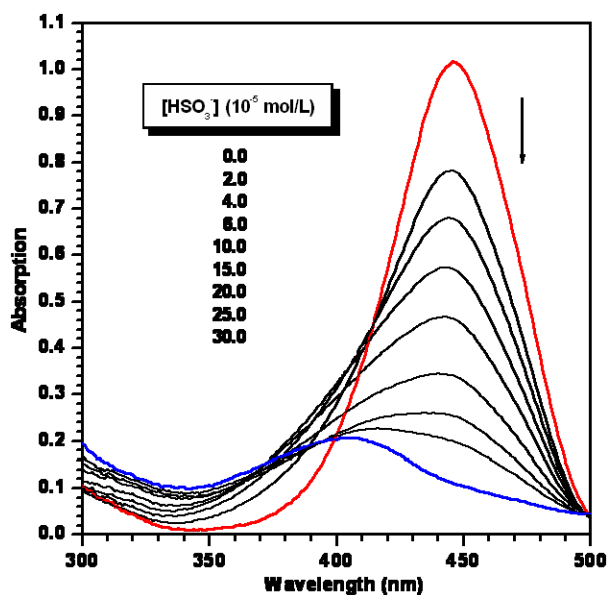

**Figure S6.** UV-vis spectra of **C1** (10  $\mu\text{M}$ , in THF/H<sub>2</sub>O = 1/99, pH 5.0) in the presence of different concentrations of  $\text{HSO}_3^-$ .

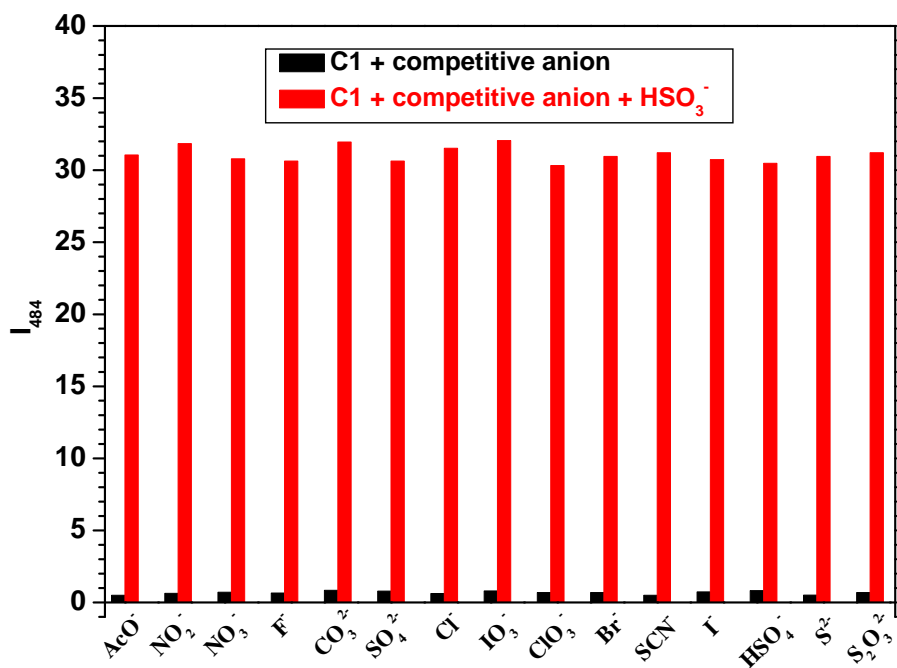

**Figure S7.** Fluorescent responses of **C1** (10  $\mu\text{M}$ , in THF/H<sub>2</sub>O = 1/99, pH 5.0) to  $\text{HSO}_3^-$  (200  $\mu\text{M}$ ) in the presence of other competitive ions (500  $\mu\text{M}$ ).

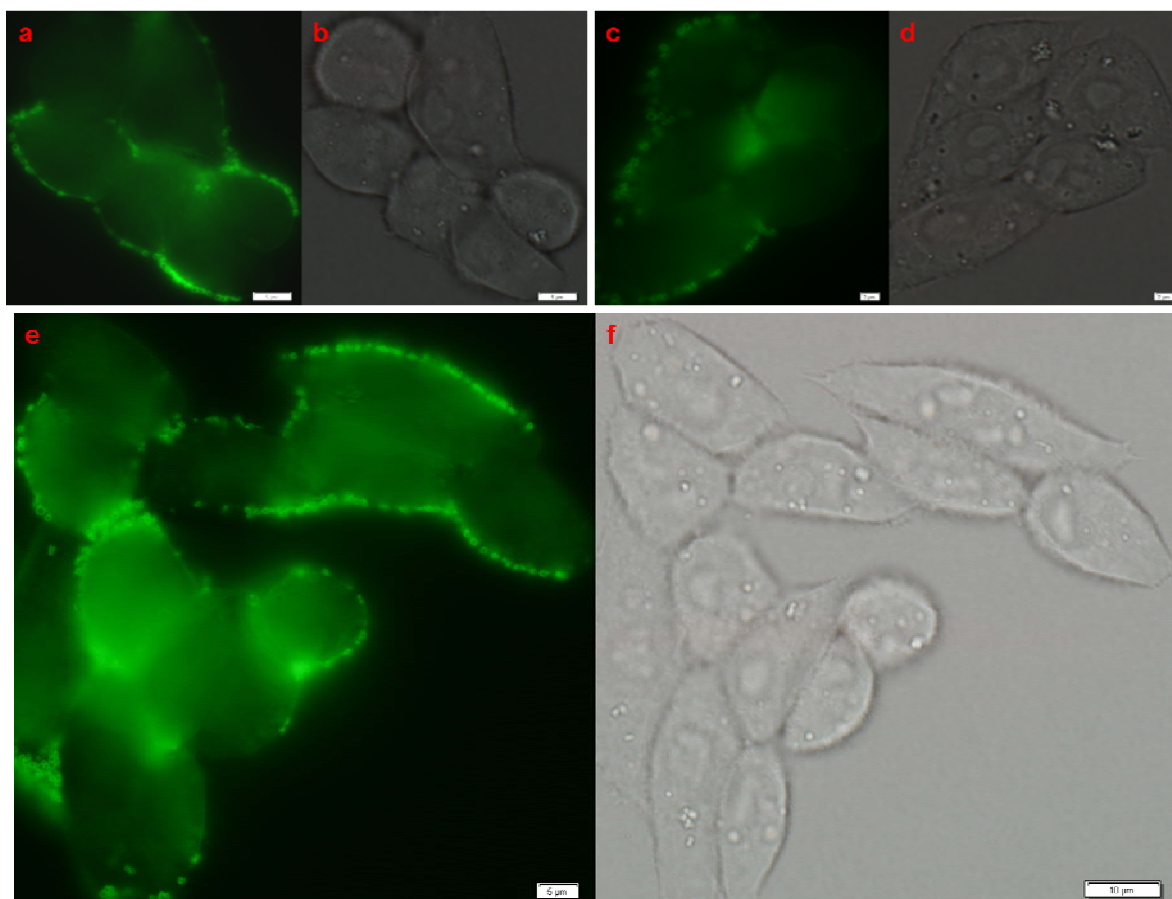

**Figure S8.** Fluorescence and DIC images of HeLa cells. The cells were pre-treated with  $\text{HSO}_3^-$  ( $100 \mu\text{M}$ ) and then stained with **C1** ( $20 \mu\text{M}$ ) for varying time. Fluorescence image for 20 minutes (a) and DIC image (b); Fluorescence image for 1 h (c) and DIC image (d); Fluorescence image for 4 h (e) and DIC image (f); all images were acquired with  $100\times$  objective lens.

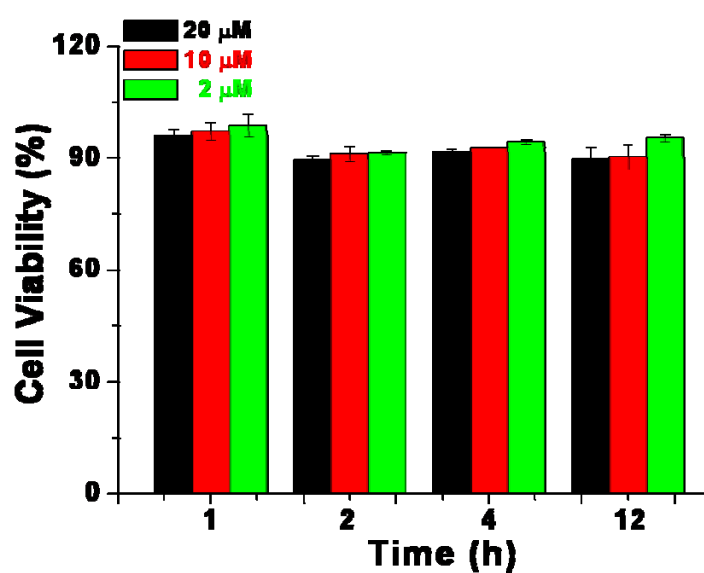

**Figure S9.** Check of viability of **C1** on the HeLa cells. Here % of viability was calculated with respect to the growth of cells without **C1**.

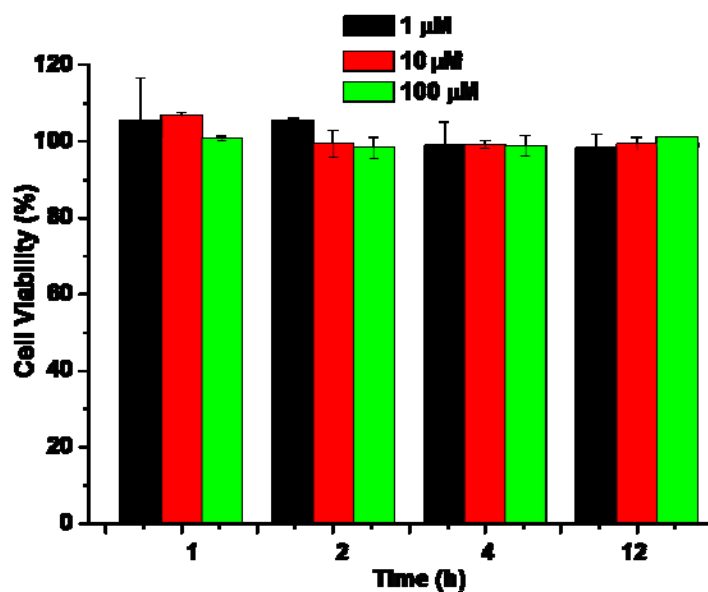

Figure S10. Check of viability of NaHSO<sub>3</sub> on the HeLa cells.

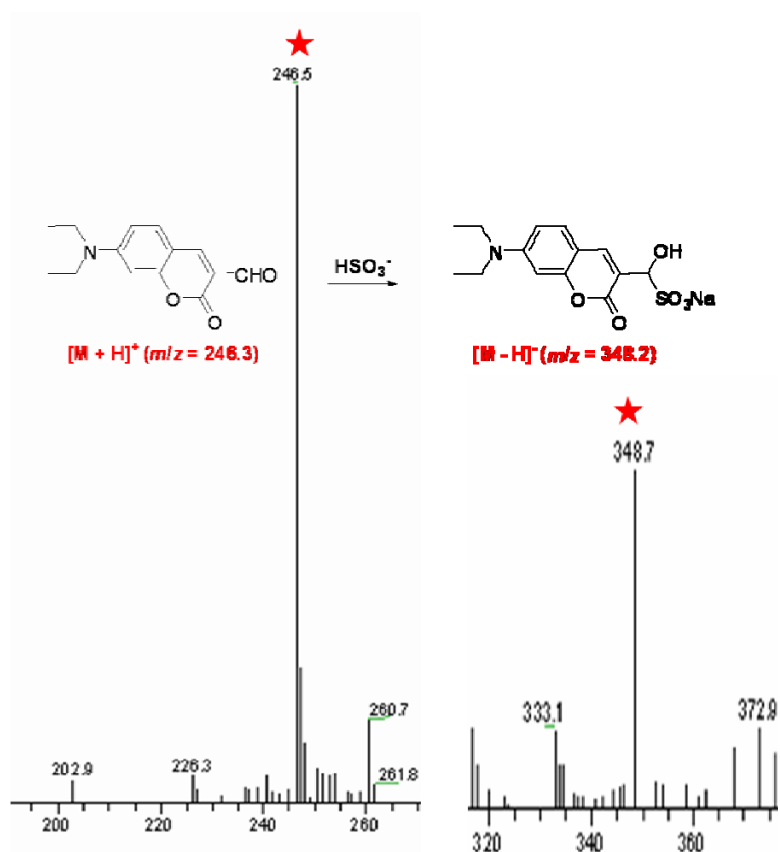

Figure S11. ESI-MS spectra of C1 (left) and the product of the reaction between C1 and HSO<sub>3</sub><sup>-</sup> (right).

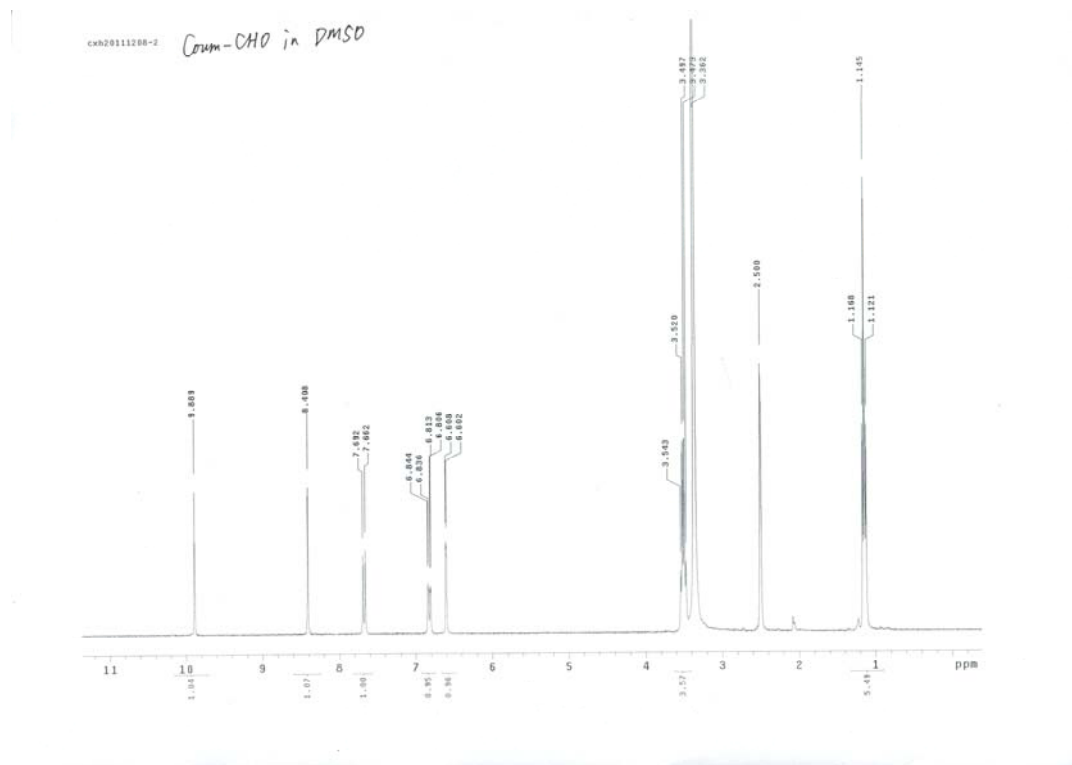

**Figure S12.**  $^1\text{H}$  NMR spectra of compound **C1** in  $\text{DMSO}-d_6$ .

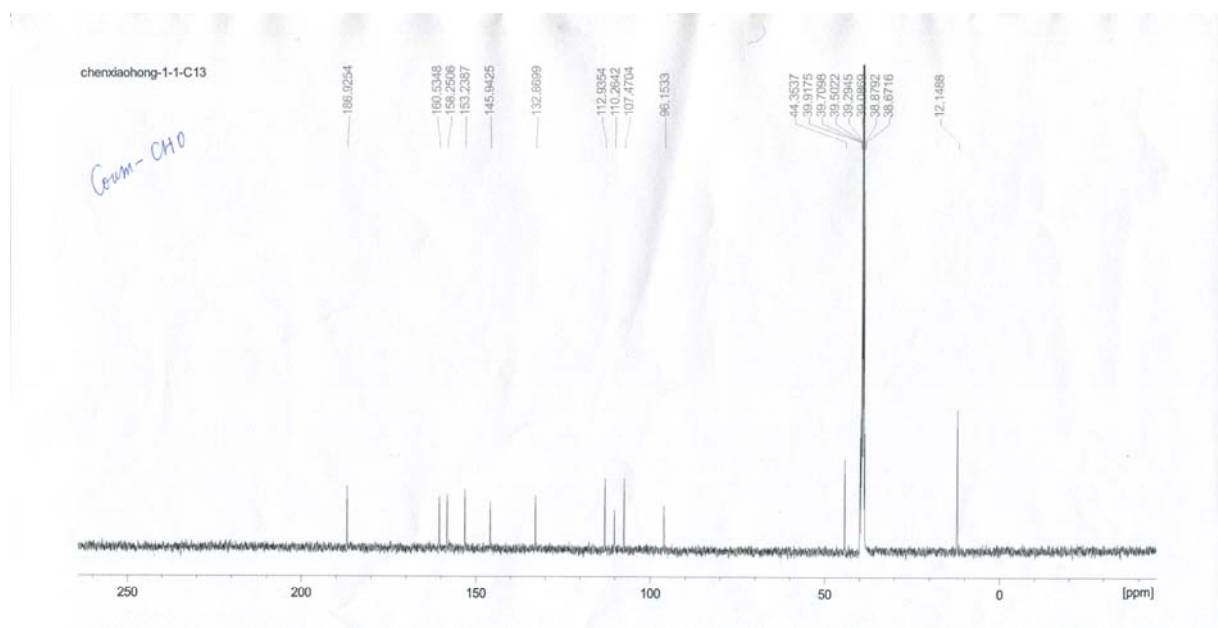

**Figure S13.**  $^{13}\text{C}$  NMR spectra of compound **C1** in  $\text{DMSO}-d_6$ .



Shanghai Mass Spectrometry Center  
Shanghai Institute of Organic Chemistry  
Chinese Academy of Sciences  
High Resolution MS Data Report

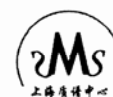

Instrument

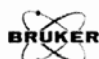

Bruker Daltonics, Inc. APEXIII 7.0 TESLA FTMS

|                     |                                   |
|---------------------|-----------------------------------|
| Card Serial Number  | E131054                           |
| Analysis Name       | D:\Data\zjf2013\20130516_000012.d |
| Sample Name         | CXH-1                             |
| Acquisition Date    | 3/2/2013 2:21:04 PM               |
| Operator:           | zjf                               |
| Ionization Mode     | ESI-Positive                      |
| Ion Mass (Measured) | 268.0947                          |

| Sum Formula            | Sigma | m/z      | Err [ppm] | Mean Err [ppm] | Err [mDa] | rdb  | N Rule | e <sup>-</sup> |
|------------------------|-------|----------|-----------|----------------|-----------|------|--------|----------------|
| C 14 H 15 N 1 Na 1 O 3 | 0.010 | 268.0944 | -1.11     | -1.38          | -0.30     | 7.50 | ok     | even           |

Bruker Daltonics DataAnalysis 3.4

printed: 3/2/2013 2:27:59 PM

Pag1 of 1

**Figure S14.** HR-MS spectra of compound C1.
